# Supplementary material
Source: publisher figshare collection journal article supplement (https://gsajournals.figshare.com/articles/dataset/_/12985430)
Supplement: Supplementary file 1 [file 1]

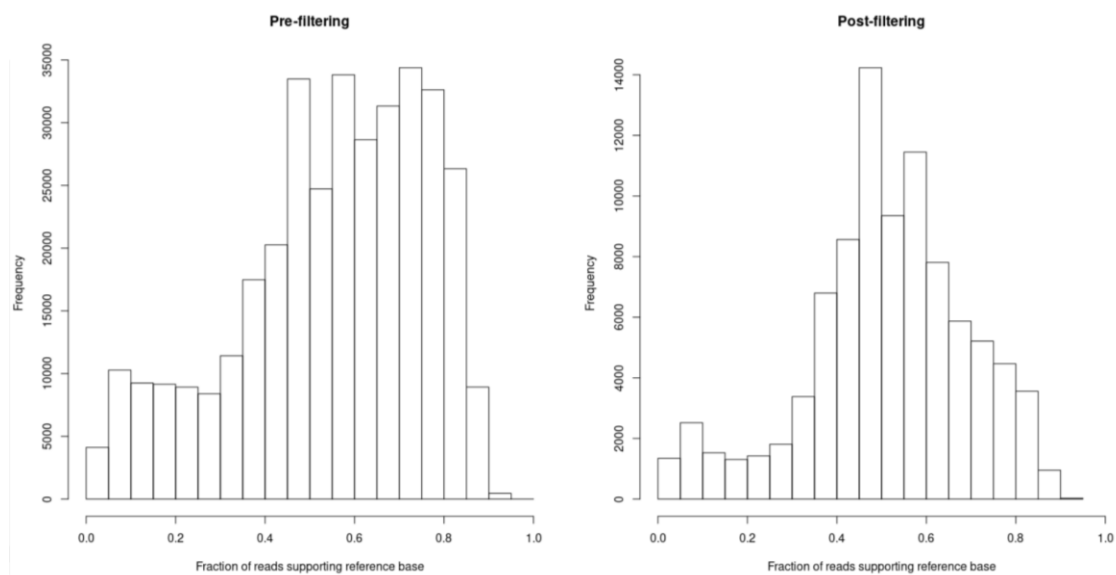

**Figure S2** Fraction of reads supporting reference base at ancestral heterozygous sites in line CC-F before and after genomic filtering of poor-quality regions.
