# Supplementary material
Source: publisher figshare collection journal article supplement (https://gsajournals.figshare.com/articles/dataset/_/12985430)
Supplement: Supplementary file 2 [file 1]

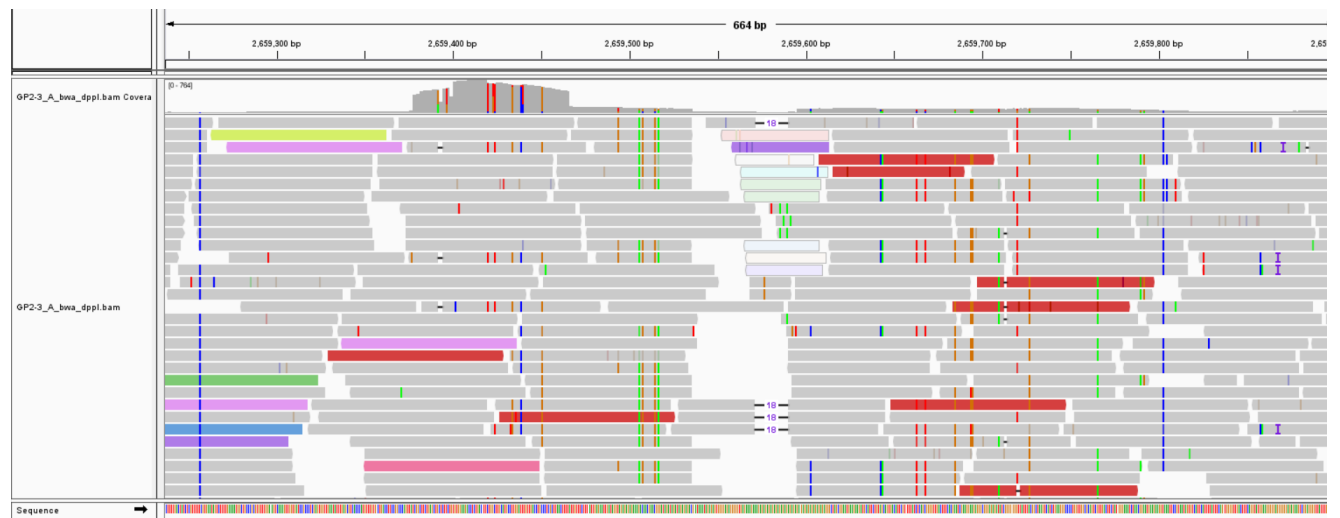

**Figure S1** Example of a region that was filtered out as a suspected hidden genomic duplication in the *S. polyrhiza* genome. Note the clusters of derived variants all present on the same reads.
