# Supplementary material
Source: publisher figshare collection journal article supplement (https://gsajournals.figshare.com/articles/dataset/_/12985430)
Supplement: Supplementary file 3 [file 1]

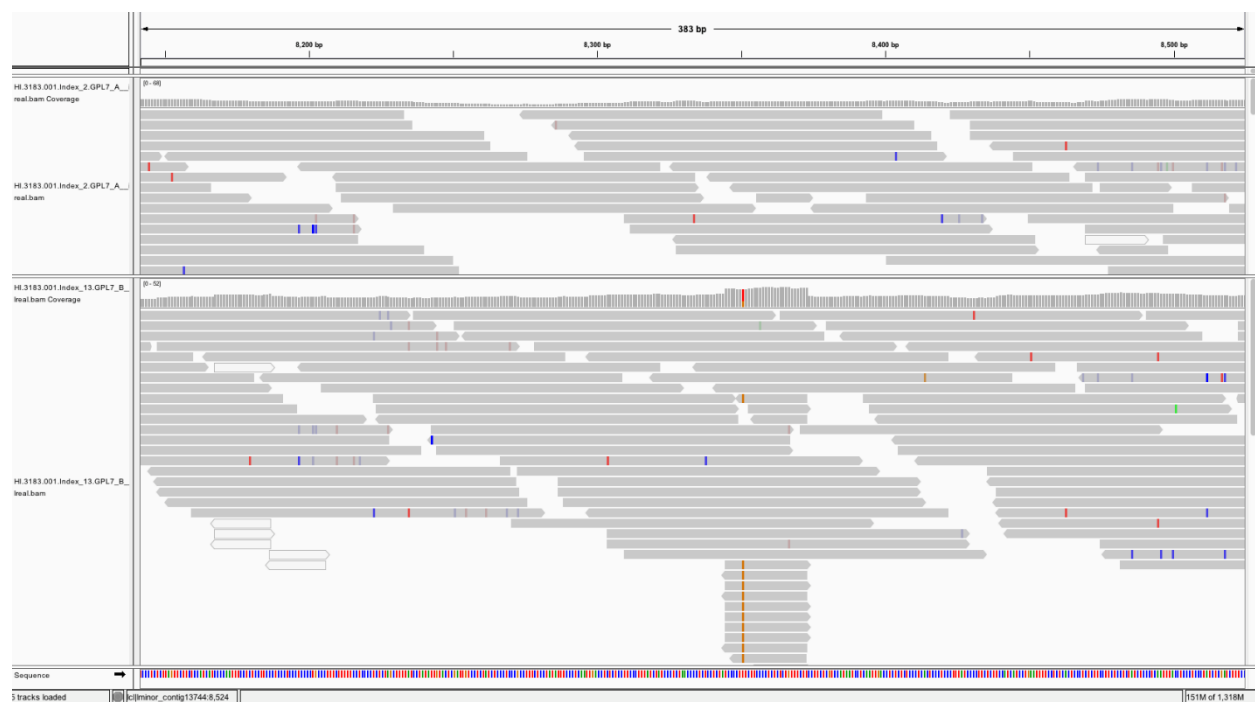

**Figure S4** Bottom track, line with a candidate *de novo* mutation that was eliminated from analysis as a suspected sequencing error. This was decided based on the short, identically mapping reads that the *de novo* base is exclusively present on. Top track, sample line not carrying evidence of a *de novo* mutation.
