# Supplementary material
Source: publisher figshare collection journal article supplement (https://gsajournals.figshare.com/articles/dataset/_/12985430)
Supplement: Supplementary file 4 [file 1]

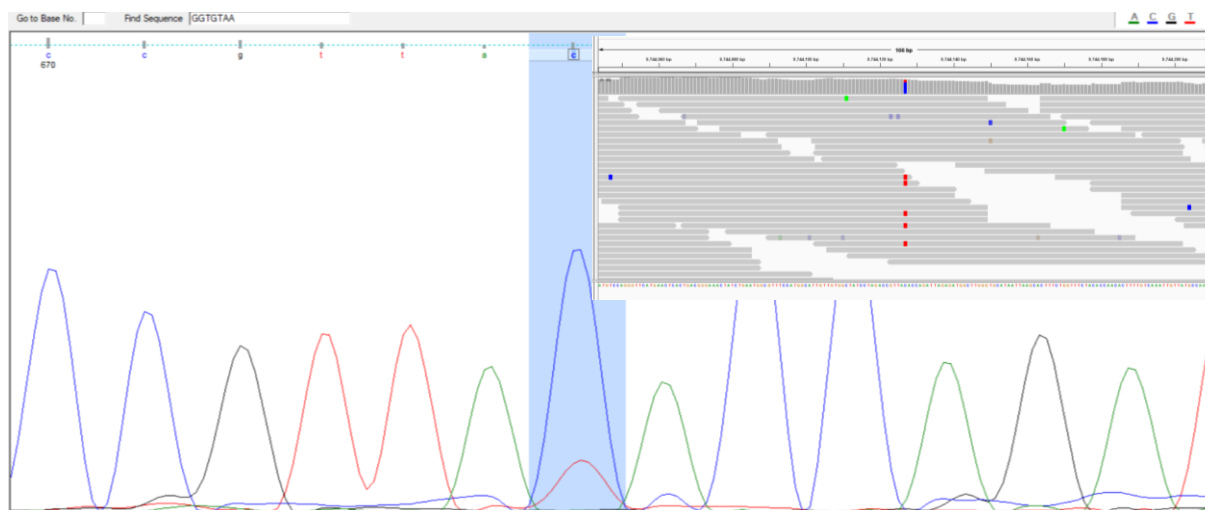

**Figure S3** Visualization of a validated *de novo* SNP from both Sanger sequencing and Illumina short read data. Both sequencing platforms suggest that the *de novo* base is present at below 50% frequency in the MA line.
