# Supplementary material
Source: publisher figshare collection journal article supplement (https://gsajournals.figshare.com/articles/dataset/_/12985430)
Supplement: Supplementary file 5 [file 1]

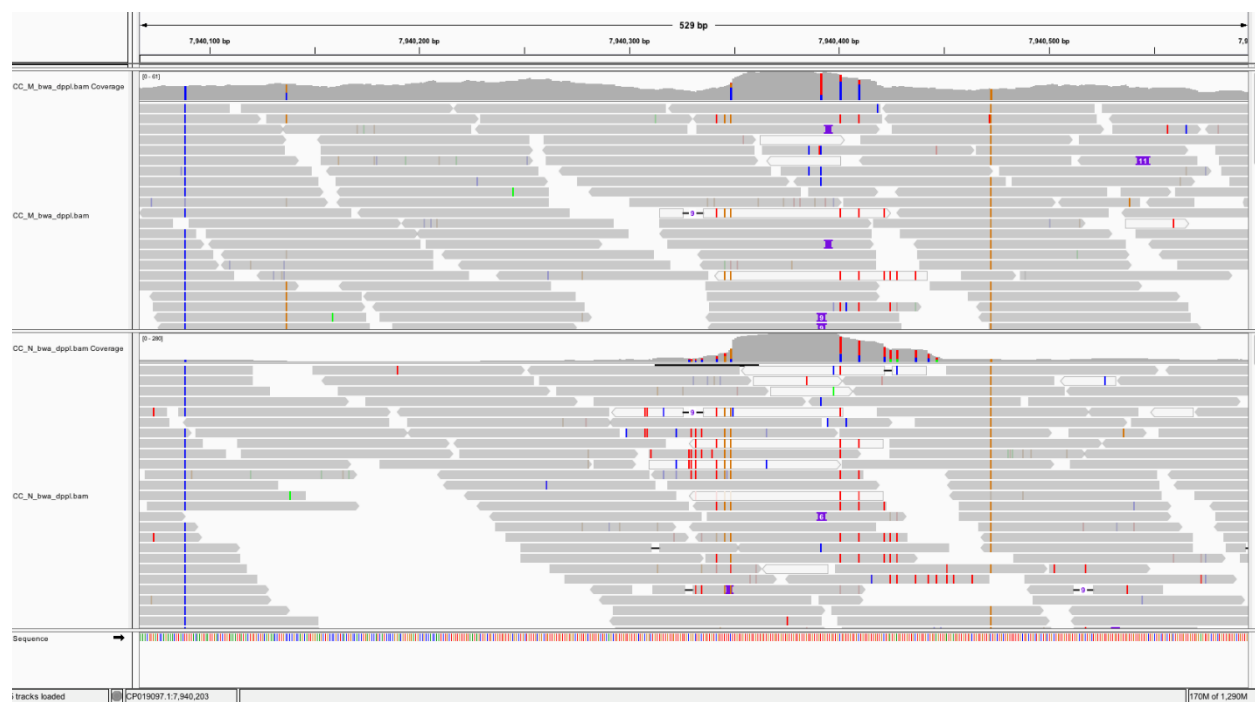

**Figure S5** Bottom track, line with a candidate *de novo* mutation that was eliminated from analysis due as a suspected error. This was decided based on the presence of highly divergent reads containing the majority of non-reference bases in this region, including the *de novo* mutant base. This is likely an issue of collapsed, divergent duplicates in the reference genome. Top track, sample line not carrying evidence of a *de novo* mutation but still showing evidence of a hidden duplication.
